# Supplementary material
Source: Springer Nature journal article supplement (https://www.springermedizin.de/resource/supplementary/12885_2012_4027_MOESM19_ESM.pdf/9465002)

# Defining Abnormal TEBs

3D

**A**

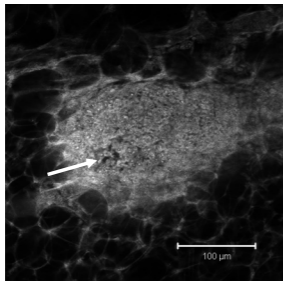

**C**

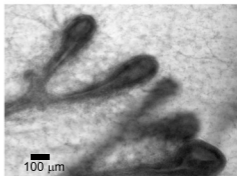

**B**

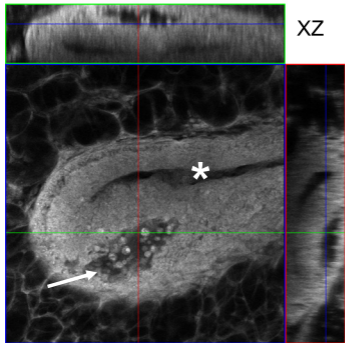

XZ

XY

YZ

Supplement: MOESM19 [file 9465002]
